# Supplementary material for: Meta-Analysis of Parent Training Programs Utilizing Behavior Intervention Technologies
Source: MDPI journal article supplement (doi:10.3390/socsci10100367), 2021-09-29
Supplement: s1 [file s1]

**Table S1.** Study Variables.

| #  | Authors (Date)                                          | BITs Level                                | Active Comparison Study | Racial Minority Study | Low Socioeconomic Status Study | Clinical Study |
|----|---------------------------------------------------------|-------------------------------------------|-------------------------|-----------------------|--------------------------------|----------------|
| 1  | Baker, Sanders, Turner, & Morawska (2017)               | FAA-BIT                                   | No                      | No                    | No                             | No             |
| 2  | Breitenstein, Fogg, Ocampo, Acosta, & Gross (2016)      | FAA-BIT                                   | No                      | Yes                   | Yes                            | No             |
| 3  | Cefai et al. (2010)                                     | FAA-BIT<br>FTF with BITs as ad-<br>juncts | No *                    | No                    | No                             | No             |
| 4  | Comer et al. (2017)                                     | Teletherapy                               | Yes                     | No                    | No                             | Yes            |
| 5  | Dadds et al. (2019)                                     | Teletherapy: Rural<br>Teletherapy: Urban  | Yes                     | No                    | No                             | Yes            |
| 6  | Day & Sanders (2018)                                    | FAA-BIT<br>BITs with Human Sup-<br>port   | No *                    | No                    | No                             | No             |
| 7  | DuPaul et al (2018)                                     | BITs with Human Sup-<br>port              | No*                     | No                    | No                             | Yes            |
| 8  | Enebrink et al. (2012)                                  | BITs with Human Sup-<br>port              | No                      | No                    | No                             | Yes            |
| 9  | Franke, Keown, & Sand-<br>ers (2016)                    | BITs with Human Sup-<br>port              | No                      | No                    | No                             | No             |
| 10 | Ghaderi, Kadesjö,<br>Björnsdotter, & Enebrink<br>(2018) | FAA-BIT                                   | Yes                     | No                    | No                             | Yes            |

|    |                                                      |                                    |      |     |     |     |
|----|------------------------------------------------------|------------------------------------|------|-----|-----|-----|
| 11 | Irvine et al. (2015)                                 | FAA-BIT                            | No   | Yes | No  | No  |
| 12 | Jones et al. (2014)                                  | FTF with BITs as Adjuncts          | Yes  | Yes | Yes | Yes |
| 13 | Morawska et al. (2014)                               | FAP-BIT                            | No   | No  | No  | No  |
| 14 | Nixon, Sweeney, Erickson, & Touyz (2003)             | FTF with BITs as Adjuncts          | No   | No  | No  | Yes |
| 15 | Porzig- Drummond, Stevenson, & Stevenson (2015)      | FAP-BIT                            | No   | No  | No  | No  |
| 16 | Rabbitt et al. (2016)                                | BITs with Human Support            | Yes  | No  | No  | Yes |
| 17 | Sanders, Baker, & Turner (2012)                      | FAA-BIT                            | No   | No  | No  | Yes |
| 18 | Sanders, Calam, Durand, Liversidge, & Carmont (2008) | FAP-BIT                            | Yes  | No  | No  | No  |
| 19 | Sanders, Dittman, Farrugia, & Keown (2014)           | FAA-BIT                            | Yes  | No  | No  | No  |
| 20 | Sanders, Montgomery, & Brechman- Toussaint (2000)    | FAP-BIT                            | No   | No  | No  | No  |
| 21 | Sourander et al, (2016)                              | BITs with Human Support            | No   | No  | No  | Yes |
| 22 | Stormshak et al. (2019)                              | FAA-BIT<br>BITs with Human Support | No * | No  | Yes | No  |

|    |                          |                         |     |    |    |     |
|----|--------------------------|-------------------------|-----|----|----|-----|
| 23 | Wetterborg et al. (2019) | BITs with Human Support | No  | No | No | No  |
| 24 | Xie et al. (2013)        | Teletherapy             | Yes | No | No | Yes |

\* Study included BITs and FTF treatment groups compared to WLC; only BITs treatment groups analyzed.

**Table S2.** Comparisons by Treatment Variables: Waitlist and Active Control Studies.

| Variable                              | <i>F</i> | <i>p</i> |
|---------------------------------------|----------|----------|
| Waitlist or Education Control Studies |          |          |
| Human Support                         | 0.222    | 0.880    |
| Attrition                             | 0.250    | 0.860    |
| Low-SES Study                         | 2.671    | 0.121    |
| Racial Minority Study                 | 1.494    | 0.238    |
| Clinical Study                        | 0.894    | 0.358    |
| Continent                             | 2.375    | 0.125    |
| Active Control Studies                |          |          |
| Human Support                         | 1.382    | 0.381    |
| Attrition                             | 1.361    | 0.386    |
| Low-SES Study                         | 1.943    | 0.206    |
| Racial Minority Study                 | 3.872    | 0.090    |
| Clinical Study                        | 0.105    | 0.765    |
| Continent                             | 0.839    | 0.477    |

\*\*Significant  $p < 0.05$ .
